# Supplementary figures and images for: A tungsten-based solar absorber with a strip-combined starfish structure with high photothermal conversion efficiency and low radiative heat loss
Source: Royal Society of Chemistry journal article supplement (doi:10.1039/d5cp03164h), 2025-01-01

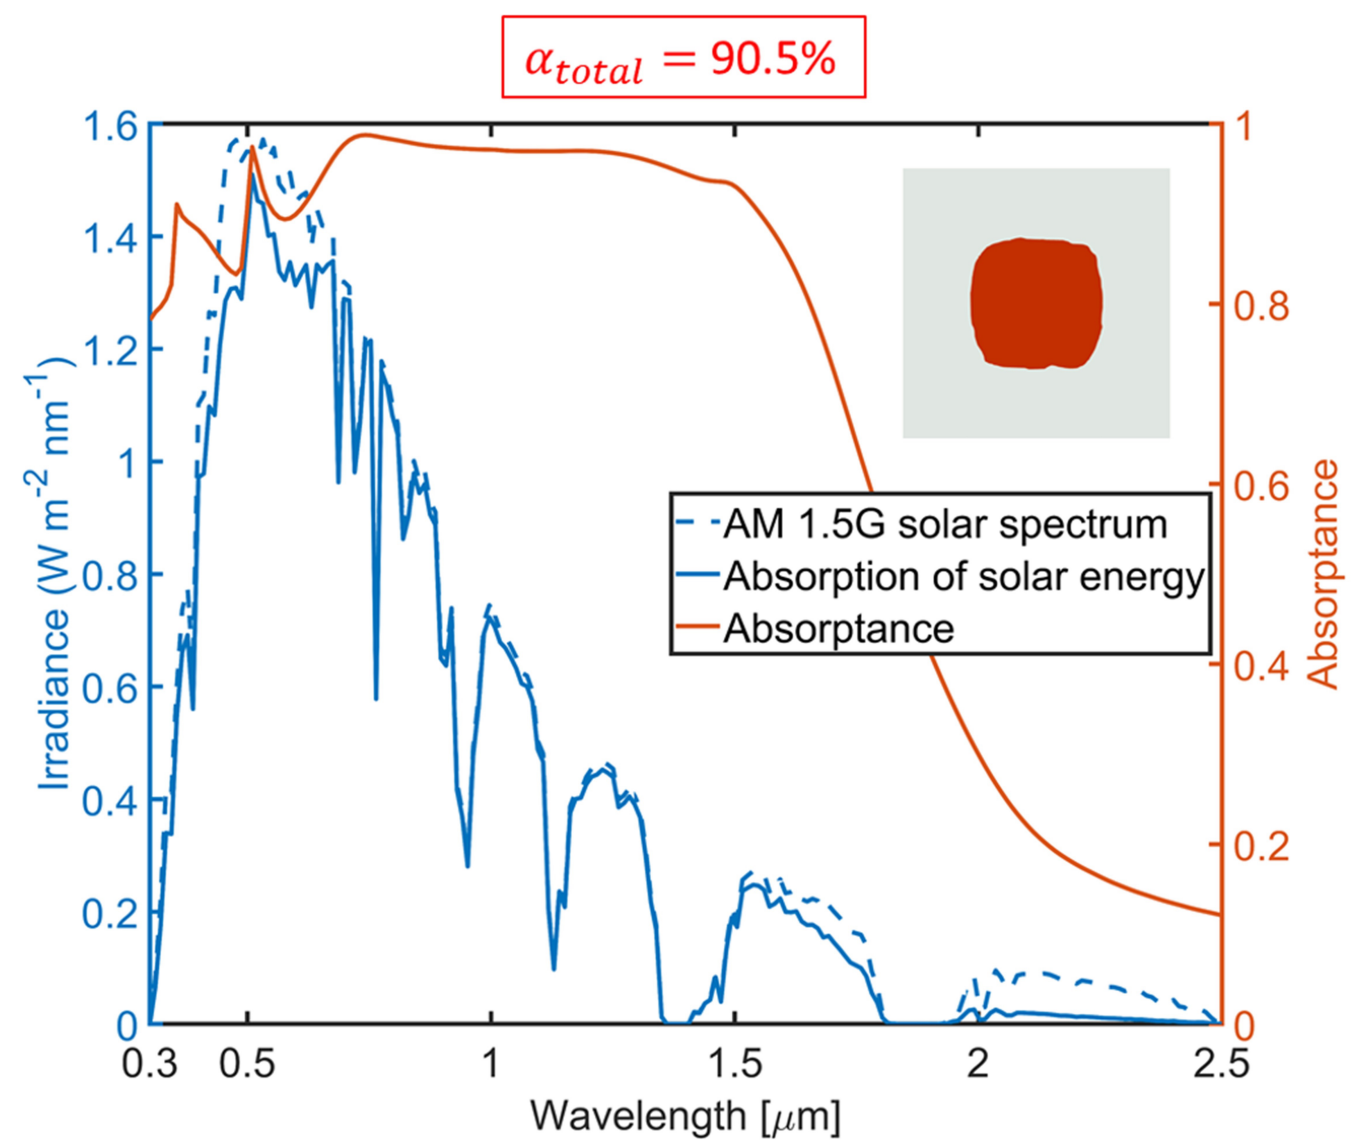

Supplement: d5cp03164h3.pdf [file d5cp03164h3.pdf]
